# Supplementary material
Source: publisher figshare collection journal article supplement (https://acs.figshare.com/ndownloader/files/3870865)
Supplement: Supplementary file 1 [file 3870865]

*Supporting Information for:*

**The Effect of  $\text{Mg}^{2+}$  Cations on the Dynamics and Efficiency of Hole Transport in DNA**

Arun Kalliat Thazhathveetil, Anton Trifonov, Michael R. Wasielewski,\* and Frederick D.

Lewis\*

*Department of Chemistry and Argonne-Northwestern Solar Energy Research (ANSER) Center,*

*Northwestern University, Evanston, Illinois 60208*

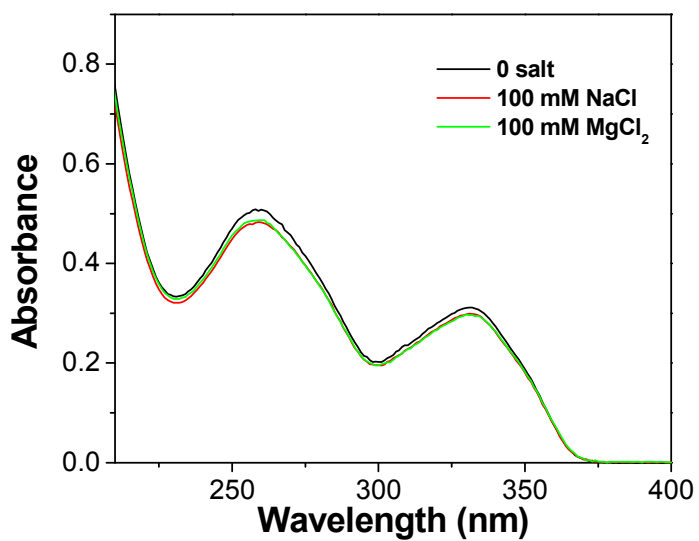

**Figure 1S.** Absorption spectra of hairpin A<sub>3</sub>G<sub>3</sub> in 10 mM sodium phosphate buffer (pH 7.2) with no added salt and with 100 mM NaCl and 100 mM MgCl<sub>2</sub>.

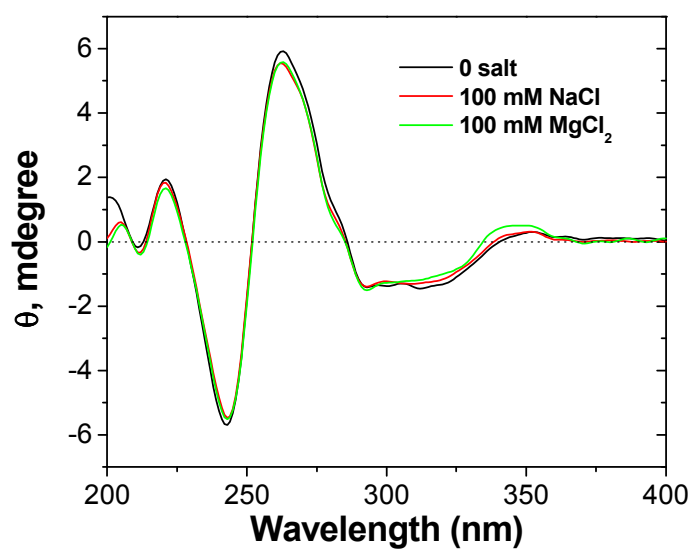

**Figure 2S.** Circular dichroism spectra of hairpin A<sub>3</sub>G<sub>3</sub> in 10 mM sodium phosphate buffer (pH 7.2) with no added salt and with 100 mM NaCl and 100 mM MgCl<sub>2</sub>.
